# Supplementary material
Source: Springer Nature journal article supplement (https://www.springermedizin.de/resource/supplementary/12908_2008_73_MOESM3_ESM.pdf/9525370)

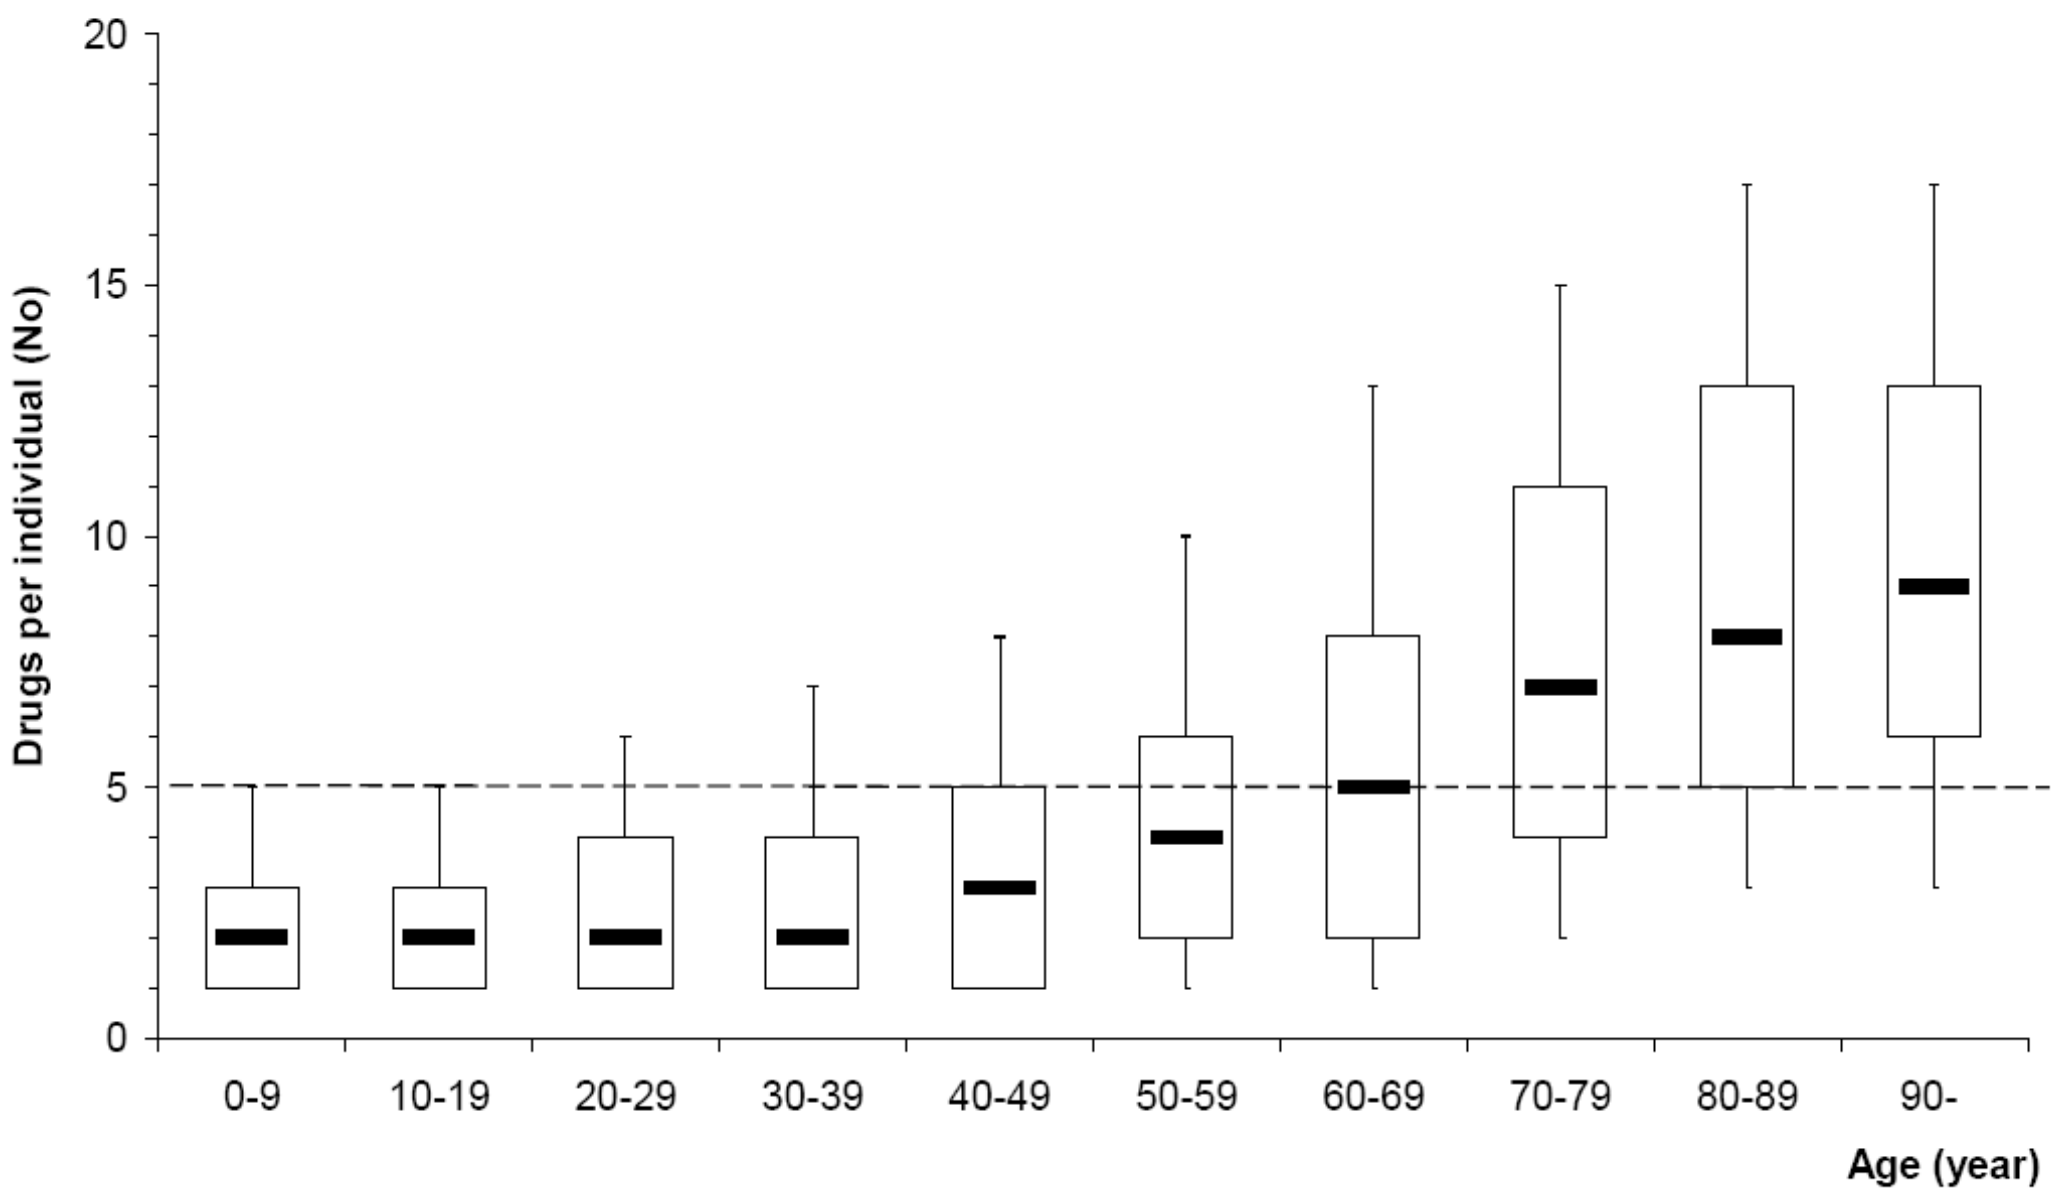

Supplement: MOESM3 [file 9525370]
